# Supplementary material for: Extensive genomic duplication during early chordate evolution
Source: Springer Nature journal article supplement (doi:10.1038/ng884), 2002-05-28
Supplement: 41588_2002_BFng884z_MOESM2_ESM.pdf [file 41588_2002_BFng884z_MOESM2_ESM.pdf]

## Web Note B

At the level of chromosome pairs, we detected paralogs ( $sm \geq 3$ ) between 55 pairs of chromosomes not reported in Venter *et al.*'s Figure 13, and we did not detect significant paralogs between 21 pairs of chromosomes that they reported; 96 chromosome pairs are common to both studies. These differences may be due in part to the poor overlap between novel gene predictions from Celera and Ensembl (Hogenesch, J.B. *et al.* A comparison of the Celera and Ensembl predicted gene sets reveals little overlap in novel genes. *Cell* **106**, 413-415, 2001).
