# Supplementary material for: Extensive genomic duplication during early chordate evolution
Source: Springer Nature journal article supplement (doi:10.1038/ng884), 2002-05-28
Supplement: 41588_2002_BFng884z_MOESM3_ESM.pdf [file 41588_2002_BFng884z_MOESM3_ESM.pdf]

### Web Note C

Our efforts to compare the ages of pairs of duplicated genes located within individual paralogons were inconclusive due to the small number of sequences available for analysis (only 14 of the 504 paralogons of  $sm \geq 3$  contained two or more gene pairs that were used in the molecular clock analysis).
